# Supplementary material for: A phage-encoded sponge protein suppresses TIR-Caspase immune signaling
Source: Research Square preprint supplement (doi:10.21203/rs.3.rs-7669871/v1), 2025-10-08
Supplement: Supplementary file 1 [file d9b92ca77d4ec0c835fd6f7d.xlsx]

## Sheet: Table S2
Table S1 Proteins analyzed in the study. The names, accession numbers, source strains, and sequences are listed.
System	Name	Strain	Accession number	Sequence
Thoeris	EcTIR	Escherichia coli strain CVM N17EC0984	ROBB00000000	MRTFNLFISHSWKYSNTYEQLVALLKNRGYFNFKNYSVPRVDPIIGAQDDFALYSAIRSQMAPSSVVIILAGVYASYSKWIDAEIRIAQEYRKPIIAIEPWGSERTSMKVKQAAHKIVKWNTESIVSAIRELA*
	EcCaspase			MKKALFIGINEYAELDALSGCENDAAKMAEALSRHADGRPNFEARTLTHCSATPLNKDFLEYEIQNLFSGECDVALFYFAGHGYFDNNIDEGMLIPHDFSPRSSNGIRISDVMVWANKATNIRNKIIILDCCQAGAAGQERMLKGGETVLADGSTILTACRRDEYAKEVNDGGVFTSLMVEALYGAGANILGYITPSSLYSFVDQALGAWDQRPVFKTNVSRFVVLREVGPRVSLDTLRKLPVWFPTATHVFHLDPSFEPTSESPIDENVSIFQNLQKCNRHGLVEPVDTEHMYYAAINSTGCRLTALGVYYRNLAIKGRF*
PsThoeris	PsTIR	Pseudomonas sp. 1-7	GCF_032469335.1	MADKKVVFVAFAIEDARIRDMIKGQSLHTDSPFEYVDMSVKEAYDDEWKKKVRTRIIRSDGVLVIVSKNSLNSSGQKWEIQCAKEEKKKIRGIWAYKEDRTDLAGVKTMLWTWDNIAAWIDEL*
	PsCaspase			MRKALVVGIDHYASVSALYGCVNDSFAVKAMLDRHADGSVNFGVKHLTATGPSDSVPRDEFRQAIEELFSGDGEISLLYFAGHGHIEATGGYLCSSDVKTGHDGVSLAEIMTMANQSRVQNRVVILDSCHSGVAGGRALQQHVAEISDGVTILTASTAEQYATEENGAGVFTSLLVDALGGAAANLVGDVTPGGVYAHVDQSLGPWAQRPVFKTNVKRFVSLRKVQPPLELAELRRISEFFPNPGFQFQLDPSYEPERHKSWENNPEGIPAPNPDHNAVFKILQKYNRVGLVVPEGAPHMWHAAMESKFIRLTALGEHYRQLAEKGLI*
Type I Thoeris	ThsA	Bacillus cereus	GCF_021654875.1	MKMNPIVELFIKDFTKEVMEENAAIFAGAGLSMSVGYVSWAKLLEPIAQEIGLDVNKENDLVSLAQYYCN ENQGNRGRINQIILDEFSRKVDLTENHKILARLPIHTYWTTNYDRLIEKALEEENKIADVKYTVKQLATT KVKRDAVVYKMHGDVEHPSEAVLIKDDYEKYSIKMDPYIKALSGDLVSKTFLFVGFSFTDPNLDYILSRV RSAYERDQRRHYCLIKKEERRPDELEADFEYRVRKQELFISDLSRFNIKTIVLNNYNEITEILQRIENNI KTKTVFLSGSAVEYNHWETEHAEQFIHQLSKELIRKDFNIVSGFGLGVGSFVINGVLEELYMNQGTIDDD RLILRPFPQGKKGEEQWDKYRRDMITRTGVSIFLYGNKIDKGQV…
	ThsB			MAKRVFFSFHYQDVIDFRVNVVRNHWVTKLNQSAAGVFDASLWEDAKKTSDIALKRLINGGLNNTSVTCV LIGSQTFNRRWVRYEIMKSIEKGNKIIGIHINAFKDKYGNIKSKGPNPFDYLGYQYSSDGKQLHLYEWTG GKWEEYKDLAPYRVNQIAPESLRGKFYSLSSVYRVYDWVADDGYNKFSSWVN
Type II Thoeris	ThsA	Bacillus velezensis YAU B9601-Y2	NC_017061	MNIIGSDRNTNIGGFMWKFKELIRDKTFRRWALSIILTIPTSVSTFISFLDLDARCRLIILLILVGLSLVIIIVQFIRLLFMNNITLNLNGSEVEIKKGDIFEVPRNNYKVIAFNEYFDTQVDDVIIARETLNGQYIKRYYSHQDITELDQKIKDDVKLKIEEKNVERPFGGKTTRYSLGSVFKDMDFFLVAFSKFDRENRAQLKLNEYASCMLNVWNEINTLHASKEVFIPLLGSGITRHVDSDVGVNELLHIMLWTFQISKVKFREPAKVTILLYKNDHKKINFYKLKEFEKNGL*
	ThsB			MGYRNGNYAAFYVSEPFSESSLGANATKDFVSYNMLRAWKGKDNNYPFNDSHDKTYNVRDGSDWEKTLKPRLRKRLDQSKNIIFFLSKHTENSKALREEIDYGINVKGLPVIVVYPELSEKSDIIDCTTKVFRSEVVNLWSRVPVFKDSMLKVPTIHIPYKKDQIKKALENKDFMINSKISAGSVYFYPC*
EcCBASS	Cap15	Escherichia albertii strain MOD1-EC1698	GCF_000759775.1	MRMWELLPSKIKYGISTIISIIVFLFFLEFLGQPVLKSVSYTITTITILAFIFGKYLWKYFYIDYLKHKF CPDFNGRWIGKIESNYSGGTKVEFPLEIKADFFSIKMKGNTTIGRTYSNYCKVVRAEDDSFELVYMFKVF NDTPSITDTSFYEGAARLRVIDIKTMNMKGVFWTNRCWENGKNTAGIIELSKEV
	CdnB			MNCSDLFYADTNTENTLHQRTQLSEVILSKGIAKKNELIEFLRQELKEAFDCDVRFWLQGSYKSHTLIKP VDKFSSYDIDIGVYLFFDAENEGVDSKDVKETLRDALLSYCSINNEAKLQESKNACEGLKFSTFLTVDTP IYYKTDTKIKLATDKGWSDSDPKAIQDWITNYYKDKSDRALMKRLVRYFKAWVNVKWQNTGFKKIPSLAI NVLVAQHMKQHVREDDCFIYTALSICEELESTLIVRNPLNNSNLISMPQDAECFAHQKLDELKQVCLSCI KSDDIKRGAHFSNLFQHYFPQISLDSATGSTGLPTVVNVPEISVCRYDKNGNHVETIITDRLTVNKGDSL TFTIRNHYDFNIYSSAQWTVRNIGSQANDANDIGHSVTGKPSES…
YaCBASS	Cap15	Yersinia aleksiciae isolate IP28587	GCF_902168595.1	MKSHEYIVICGLNRSKVGRYIAIVASFLSFISIFLALTALEWLKNYHINSHIPASVFSLISAGGIYMGLY AWFDKNLWQNSYLGKFLCVPNLEGRWHVDGHTRSEGGNTWEGELKIVQTWDKVRIHLKTKASHSDSVTAS IIYDKGIGYQLLYNYRNQPKTGEEHLTSHVGFAEFRFDADLKSAEGHYFNGQGRATYGTMTITRIEHA
	CdnE			MPNPAFSARIERMKLRRKGTSDQLRVATESISNQRYDGLEKYTLLEDVLHLSESWENRGKGDSAIRYIIG AMQPVDARYTEISFETASRIENQLSKKLAHNLDFRVQGSVPLDIHIKGFSDVDLLIIDTQMLMYDVNGGG SYSPTSRDGRDVIIELREAARDALEMAFPTALVDDNNAKSLRITGGSLQREVDVVPSIWWDTKEYQSMKR EEDRGVTIIDKNTRERIYNAPFLHIKRIKDKCDQCNGGIRKSIRLLKTLKADSKDEGSDIDLSSYDIASL MFHADANNLNHSTYYELAVLVETHRLLNYLSQNYEVAMQLDVPNGTRKIFEKPESHVELLKLTEMVNSVV TEVLREITGRPTDFYANDKCDVLRKQMVY
	gp224	Enterobacteria phage T6	NC_054907	MAKINELLRESTTTNSNSIGRPNLVALTRATTKLIYSDIVATQRTNQPVAAFYGIKYLNPDNEFTFKTGATYAGEAGYVDREQITELTEESKLTLNKGDLFKYNNIVYKVLENTPFADIEESDLELALQIAIVLLKVRLFSDAAVTSKFESSDSEIADARFQINKWQTAVKSRKLKTGITVELAQDLEANGFDAPNFLEDLLATEMADEINKDILQSLITVSKRYKVTGITDTGFIDLSYASAPEAGRSLYRMVCEMVSHIQKESTYTATFCVASARAAAILAASGWLKHKPEDDKYLSQNAYGFLANGLPLYCDTNSPLDYVIVGVVENIGEKEIVGSIFYAPYTEGLDLDDPEHVGAFKVVVDPESLQPSIGLLVRYALSANPYTVAKDEKEARIID…
	TadIV-1	Enterobacteria phage T4	NC_000866	MAQLSAGFGYEYYTAPRRVSVAPKKIQSLDDFQEVVRNAFQDYARYLKEDSQDCLEEDEIAYYTQRLEQLKNLHEVRAEVSKSMNKLIRFKE*
	Acb2		NC_000866	MIEDIKGYKPHTEEKIGKVNAIKDAEVRLGLIFDALYDEFWEALDNCEDCEFAKNYAESLDQLTIAKTKLKEASMWACRAVFQPEEKY*
	Vs.5		NC_000866	MAKIIIEGSEDVLNAFASGLVTQANSNLMKRGIWVILMEFILRQKFLFKAMAFMNLFV*
	Vs.6		NC_000866	MKAYQILEGTHKGTIYFEDGIQARIIVSKTFKEDSFVDPEIFYGLHAREIEIEPQPTVKIEGGQHLNVNVLRHETLEDAVKHPEKYPQLTIRVSGYAVRFNSLTPEQQRDVIARTFTESL*
	Vs.7		NC_000866	MMTDTQLFEYLYFSPKTIKNKLVNHFEILAKNNILSEFYPKQYKLQKGVFKGCRVLCTAPNARLMNKIPYFTMEFIDGPFKGLITQSLMAYDSEPFLIKEQSWINLFSN*
	Vs.8		NC_000866	MRDSRQPVIRSSPSAVMGKYRNGQFMCHGMAQTYRAYREEMRTFLTGPYLSLMNAFTHHSDARVEEICKNEYIPPFEDLLKQYCTLRLDGGRQSGKSIAVTNFAANWLYDGGTVIVLSNTSAYAKISANNIKKEFSRYSNDDIRFRLFTDSVRSFIGNKGSKFRGLKLSRILYIIDEPVKSPDMDKIYSVHIDTVHYCCNSKCCIGGITRPQFFVIGMQ*
	T2 TadIV-1	Escherichia phage T2	NC_054931	MDQLSAGFGYEYYTAPRRVSVAPKKIQSLDDFQEVVRNAFQDYARYLKEDSQDCLEEDEIAYYTQRLEQLKNLHEVRAEVSKSMNKLIRFKE*
	PJZ21992.1	Bacillus cereus	NJNO01000007.1	MTQLSAGFGYEYYTAPRRVSVAPKKIQSLDDFQEVVRNAFQDYARYLKEDSQDCLEEDEIAYYTQRLEQLKNLHEVRAEVSKSMNKLIRFKE
	UGO46789.1	Shigella phage vB_SboM_Phaginato	OL615012.1	MGLSCCVPTRGKILMAQLSAGFGYEYYTAPRRVSVAPKKIQSLDDFQEVVRKAFQDYARYLKEDSQDCLEEDEIAYYEQRLEQLKNLHEVRAEVSKSMNKLIRFKE
	QVW08921.1	Salmonella phage Lv5cm	MZ150757.1	MAQLSAGFGYEYYTAPRRVSVAPKKIQSLDDFQEVVRNAFQDYARYLKEDSQDCLEEDEIAYYEQRLEQLKNLHEVRAEVTKSMNKLIRFKE
	WP_080181666.1	Salmonella enterica subsp.enterica serovar Heidelberg	GCF_002061535.1	MAQILSGFGTHYFTADRRISVTPKKIQSLDDFQEVIRNAFQDYARYLKEDSQDCLEEDEIAYYVQRLEQLKNLHEVRAEVSKSMNKLIRFKE
	QUL77637.1 (U07TadIV-1)	Escherichia phage UPEC07	MW250787.1	MAQINSGFGYELSTASHRRISDSNPFGFTSKPKKIQGLDDFQEVIRQAFQDYARYLKEDKEDCLEEDEIEYYEQRLEQIKNLHAVRDEVAKAMNKLISFKE
	QMP18837.1	Escherichia phage CJ20	MT533174.1	MGVSFHFPTRGKILMSQINSGFGYELSTASHRRISDSNPFGFTSKPKKIQGLDDFQEVIRQAFQDYARYLKEDKDDCLEEDEIEYYEQRLEQLKNLHAVRAEVSQSLNKLIRFKE
	YP_009100654.1	Shigella phage Shf125875	NC_025437.1	MAQILSGFGTHYEASRRITESNPFGLVPKHKKIQSLDDFENRLWALFNEYKAYLKEDADDCLEEDEIAYYEQRLEQLKNFHQVRDEVSKAVKKLIPFKE
	EAA6275575.1	Salmonella enterica subsp. enterica serovar Telhashomer	AAACAY010000010.1	MASTITGLLDFQEKINKICSEYLKYLEEDLEDCKEEGEEDYADQRRRQIEEMRHFANMVSKESWALTPFYQ

## Sheet: Table S3
Table S2 Plasmids used in the study.
Name	antibiotic resistance	Promoter	description
Plasmid vectors
pBAD/His_A	Amp	araBAD
pUC19	Amp	Lac
pCDFara	Str	araBAD	Constructed in this study. Derived from pCDFDuet-1.
pCDFtet	Str	tetR/tetA	Constructed in this study. Derived from pCDFDuet-1.
pCDF	Str	-	Constructed in this study. Derived from pCDFDuet-1.
pBA559	Chlor	a constitutive promoter
pET28a	Kan	T7
Plasmids for express anti-phage system
pBAD/His_A-Thoeris	Amp	native promoter	Type IV Thoeris system with native promoter
pBAD/His_A-Type I Thoeris	Amp	araBAD promoter	Type I Thoeris system with an arabinose promoter
pBAD/His_A-Type II Thoeris	Amp	araBAD promoter	Type II Thoeris system with an arabinose promoter
pBAD/His_A-EcCBASS	Amp	araBAD promoter	CBASS system from Escherichia albertii with an arabinose promoter
pBAD/His_A-YaCBASS	Amp	araBAD promoter	CBASS system from Yersinia aleksiciae with an arabinose promoter
pBAD/His_A-KongMing	Amp	native promoter	KongMing system with native promoter
pUC19-EcTIR	Amp	Lac promoter	For express EcTIR to produce N7-cADPR.
pBAD/His_A-PsCaspase	Amp	Lac promoter	For express PsCaspase.
Plasmids for express anti-defense proteins
pCDF-Part I	Str	-	For express Part I from T4 phage.
pCDF-Part I∆Vs.3	Str	-	For express Part I∆Vs.3 from T4 phage.
pCDF-Vs.3	Str	native promoter	Vs.3 (T4 TadIV-1) with the native promoter of Part I
pCDF-Acb2	Str	native promoter	Acb2 with the native promoter of Part I
pCDF-Vs.5	Str	native promoter	Vs.5 with the native promoter of Part I
pCDF-Vs.6	Str	native promoter	Vs.6 with the native promoter of Part I
pCDF-Vs.7	Str	native promoter	Vs.7 with the native promoter of Part I
pCDF-Vs.8	Str	native promoter	Vs.8 with the native promoter of Part I
pCDFara-Vs.3	Str	araBAD promoter	arabinose inducible Vs.3 (T4 TadIV-1)
pCDFara-PJZ21992.1	Str	araBAD promoter	arabinose inducible PJZ21992.1
pCDFara-EAA6275575.1	Str	araBAD promoter	arabinose inducible EAA6275575.1
pCDFara-QUL77637.1	Str	araBAD promoter	arabinose inducible QUL77637.1
pCDFara-YP_009100654.1	Str	araBAD promoter	arabinose inducible YP_009100654.1
pCDFara-WP_080181666.1	Str	araBAD promoter	arabinose inducible WP_080181666.1
pCDFara-UGO46789.1	Str	araBAD promoter	arabinose inducible UGO46789.1
pCDFara-QMP18837.1	Str	araBAD promoter	arabinose inducible QMP18837.1
pCDFara-QVW08921.1	Str	araBAD promoter	arabinose inducible QVW08921.1
pCDFara-T2 TadIV-1	Str	araBAD promoter	arabinose inducible TadIV-1 from T2 phage
pCDFara-U07TadIV-1∆2-18	Str	araBAD promoter	arabinose inducible U07TadIV-1∆2-18
pCDFara-U07TadIV-1∆2-32	Str	araBAD promoter	arabinose inducible U07TadIV-1∆2-32
pCDFara-U07TadIV-1R19A	Str	araBAD promoter	arabinose inducible U07TadIV-1R19A
pCDFara-U07TadIV-1R18A R19A	Str	araBAD promoter	arabinose inducible U07TadIV-1R18A R19A
pCDFara-U07TadIV-1S21A S23A	Str	araBAD promoter	arabinose inducible U07TadIV-1S21A S23A
pCDFara-U07TadIV-1R18A R19A S21A S23A	Str	araBAD promoter	arabinose inducible U07TadIV-1R18A R19A S21A S23A
Plasmids for express T6 mutation proteins
pCDF-gp224	Str	native promoter	For express gp224 from ancestral T6 phage with the native promoter.
pCDF-gp224A380V	Str	native promoter	For express mutant gp224 from escaped T6 phage with the native promoter.
pCDFtet-gp224	Str	tetR/tetA promoter	Anhydrotetracycline hydrochloride inducible gp224 rom ancestral T6 phage.
Plasmids for phage T4 genome editing
pBA559-bgt	Chlor	tetR/tetA promoter	For CRISPR–Cas13 targeting bgt gene of T4 phage.
pBA559-Vs.3	Chlor	tetR/tetA promoter	For CRISPR–Cas13 targeting Vs.3 gene of T4 phage.
pUC19-Vs.3	Amp	-	T4ΔVs.3 homologous recombination donor vector.
Plasmids for proteins purification
pET28a-sumo-TadIV-1-his6	Kan	T7 promoter	For protein purification of N-terminal sumo-tagged and C-terminal his6-tagged TadIV-1.
pET28a-U07TadIV-1-his6	Kan	T7 promoter	For protein purification of C-terminal his6-tagged U07TadIV-1(TadIV-1 homogue from QUL77637.1).
pET28a-U07TadIV-1∆2-18-his6	Kan	T7 promoter	For protein purification of C-terminal his6-tagged U07TadIV-1∆2-18.
pET28a-U07TadIV-1∆2-32-his6	Kan	T7 promoter	For protein purification of C-terminal his6-tagged U07TadIV-1∆2-32.
pET28a-U07TadIV-1R18A R19A-his6	Kan	T7 promoter	For protein purification of C-terminal his6-tagged U07TadIV-1R18A R19A.
pET28a-U07TadIV-1S21A S23A-his6	Kan	T7 promoter	For protein purification of C-terminal his6-tagged U07TadIV-1S21A S23A.
pET28a-U07TadIV-1R18A R19A S21A S23A-his6	Kan	T7 promoter	arabinose inducible U07TadIV-1R18A R19A S21A S23A.

## Sheet: Table S4
Table S3 Primers used in the study
Name	Sequence	Description	The constructed plasmids	Cloning methods
T6-npgp224-F	cattaattgcgttgcgccagaacccatataaccatcg	fwd primer	pCDF-gp224, pCDF-gp224A380V	ClonExpress assembly
T6-npgp224-R	gcagcctaggttaattaattattcatcaatgataatttttggtagc	rev primer
T6-gp224-F	ctaaagaggagaaaggctcgagatggctaaaatcaacgaacttc	fwd primer	pCDFtet-gp224	ClonExpress assembly
T6-gp224-Sph1-R	gcagcagcctaggttaattaattattcatcaatgataatttttggtagc	rev primer
pUC19-EcTIR-F	gccaagcttgcatgcATGAGGACATTTAATCTATTCATAAGTCACTC	fwd primer	pUC19-EcTIR	ClonExpress assembly
pUC19-EcTIR-R	gacggccagtgaattcctaagccagctcacgaatCG	rev primer
puc19-EcoR1-F56	gaattcactggccgtcg	fwd primer, PCR amplifition of pUC19 vector		ClonExpress assembly
puc19-Sph1-R59	gcatgcaagcttggcg	rev primer, PCR amplifition of pUC19 vector
pBAD-PsCaspase-F	GAATTAACCATGCGTAAAGCACTCGTTG	fwd primer	pBAD/His_A-PsCaspase	ClonExpress assembly
pBAD-PsCaspase-R	TACGCATGGTTAATTCCTCCTGTTAGC	rev primer
pET28a-U07TadIV-1-F	aactttaagaaggagatataCCATGGCGCAGATTAATTCTGG	fwd primer	pET28a-U07TadIV-1-his6	ClonExpress assembly
pET28a-U07TadIV-1-R	GTGGTGGTGGTGCTCGAGCTCTTTAAAAGAAATTAGCTTATTCATTG	rev primer
pCDFara-vs3-F	catgccatggctcaattaagcgcag	fwd primer	pCDFara-Vs.3(TadIV-1)	Golden Gate assembly
pCDFara-vs3-R	ccgctcgagccacagtcaagaggaaaagtaaac	rev primer
T4-bgt-spacer-F	aaaccttggattcgcgttgaccggaccg	fwd primer	pBA559-T4-bgt	Golden Gate assembly
T4-bgt-spacer-R	agcacggtccggtcaacgcgaatccaag	rev primer
T4-vs3-spacer-F	aaacaaacttcggcacgaacctcatgtag	fwd primer	pBA559-T4-Vs.3(TadIV-1)	Golden Gate assembly
T4-vs3-spacer-R	agcactacatgaggttcgtgccgaagttt	rev primer
pUC19 region-F	acagatgcgtgcctggggtgcctaatg	fwd primer	pUCDonor-T4-Vs.3(TadIV-1)	ClonExpress assembly
pUC19 region-R	cagctccattaagccagccccgacac	rev primer
HR-Δvs3-UP-F	gctggcttaatggagctggctttagaagcctttcctggtaaac	fwd primer
HR-Δvs3-UP-R	tactaatggctcctgtttacttttcctcttgactgtg	rev primer
HR-Δvs3-DOWN-F	aagtaaacaggagccattagtatttttcctctgg	fwd primer
HR-Δvs3-DOWN-R	cccaggcacgcatctgtcctttactgaaagtttgtaatggc	rev primer
pCDF-F	ttaattaacctaggctgctgcc	fwd primer, PCR amplifition of pCDF vector and pCDF-Part I vector	pCDF-Part I	ClonExpress assembly
pCDF-R	gcgcaacgcaattaatgtaag	rev primer, PCR amplifition of pCDF vector
T4-Part I-F	cattaattgcgttgcgcctcaggaattccgtggtg	fwd primer	pCDF-Part I	ClonExpress assembly
T4-Part I-R	gcagcctaggttaattaattctgtattgatagtcatgttattctcc	rev primer
pCDF-F	ttaattaacctaggctgctgcc	fwd primer	pCDF-Part IΔVs.3(TadIV-1)	ClonExpress assembly
T4-Part I-vs4-R	gcagcctaggttaattaagccattagtatttttcctctgg	rev primer
pCDF-Part I-p-R	ataatcatgaggtccaggttg	rev primer, PCR amplifition of pCDF-Part I vector	-
T4-Part I-vs3-F	aacctggacctcatgattatatggctcaattaagcgcag	fwd primer	pCDF-Vs.3 (TadIV-1)	ClonExpress assembly
T4-Part I-vs3-R	gcagcctaggttaattaaccacagtcaagaggaaaagtaaac	rev primer
T4-Part I-vs4-F	aacctggacctcatgattatatgattgaagatattaagggttataaacc	fwd primer	pCDF-Acb2	ClonExpress assembly
T4-Part I-vs4-R	gcagcctaggttaattaagccattagtatttttcctctgg	rev primer
T4-Part I-vs5-F	aacctggacctcatgattatatggcaaagataattattgaaggttc	fwd primer	pCDF-Vs.5	ClonExpress assembly
T4-Part I-vs5-R	gcagcctaggttaattaacttcaatcatatttgacttcctcacc	rev primer
T4-Part I-vs6-F	aacctggacctcatgattatatgaaagcatatcaaattcttgaagg	fwd primer	pCDF-Vs.6	ClonExpress assembly
T4-Part I-vs6-R	gcagcctaggttaattaaccattacaaactttcagtaaagg	rev primer
T4-Part I-vs7-F	aacctggacctcatgattatatgatgacagacactcagc	fwd primer	pCDF-Vs.7	ClonExpress assembly
T4-Part I-vs7-R	gcagcctaggttaattaacctcaattagaaaataaatttatccaag	rev primer
T4-Part I-vs8-F	same as T4-Part I-F	fwd primer	pCDF-Vs.8	ClonExpress assembly
T4-Part I-vs8-R	gcagcctaggttaattaacattgcattccgattacgaaaaac	rev primer
pET28a-F	ctcgagcaccaccaccaccaccac	fwd primer, PCR amplifition of pET28a vector	pET28a-sumo-TadIV-1-his6	ClonExpress assembly
pET28a-R	ggtatatctccttcttaaagttaaac	rev primer, PCR amplifition of pET28a vector
SUMO-F	actttaagaaggagatataccatgtcggactcagaagtcaatc	fwd primer
SUMO-R	cccgggaccaatctgttctc	rev primer
vs3-sumo-F	gaacagattggtCCCGGGatggctcaattaagcgcag	fwd primer
vs3-His-R	gtggtggtggtgctcgagttctttaaatctaatcaatttattcatag	rev primer
637.1-de18-soeF56	GAGGAATTAACCATGCGCATAAGCGATTCCAATCC	fwd primer	pET28a-U07TadIV-1∆2-18-his6	ClonExpress assembly
637.1-ATG-R55	CATGGTTAATTCCTCCTGTTAGC	rev primer	pCDFara-U07TadIV-1∆2-18
637.1-de32-soeF54	GAGGAATTAACCATGAAGAAAATCCAGGGGTTAGATGAC	fwd primer	pET28a-U07TadIV-1∆2-32-his6	ClonExpress assembly
637.1-ATG-R55	CATGGTTAATTCCTCCTGTTAGC	rev primer	pCDFara-U07TadIV-1∆2-32
R19A-soeF55	TCATCGTgcCATAAGCGATTCCAATCCGT	fwd primer	pCDFara-U07TadIV-1R19A	ClonExpress assembly
R19A-soeR55	CTTATGgcACGATGAGAAGCTGTTGATAAC	rev primer
R18R19-soeF55	TCTCATgcTgcCATAAGCGATTCCAATCCGT	fwd primer	pET28a-U07TadIV-1R18A R19A-his6	ClonExpress assembly
R1819_S2123-soeR55	ATTGGcATCGgcTATGgcAgcATGAGAAGCT	rev primer	pCDFara-U07TadIV-1R18A R19A
S21S23A-soeF55	CATAgcCGATgCCAATCCGTTTGGATTCACA	fwd primer	pET28a-U07TadIV-1S21A S23A-his6	ClonExpress assembly
S21S23A-soeR55	TTGGcATCGgcTATGCGACGATGAGAAG	rev primer	pCDFara-U07TadIV-1S21A S23A
S21S23A-soeF55	CATAgcCGATgCCAATCCGTTTGGATTCACA	fwd primer, use U07TadIV-1S21A S23A as the template.	pET28a-U07TadIV-1R18A R19A S21A S23A-his6	ClonExpress assembly
R1819_S2123-soeR55	ATTGGcATCGgcTATGgcAgcATGAGAAGCT	rev primer, use U07TadIV-1S21A S23A as the template.	pCDFara-U07TadIV-1R18A R19A S21A S23A
