# Supplementary material for: A phage-encoded sponge protein suppresses TIR-Caspase immune signaling
Source: Research Square preprint supplement (doi:10.21203/rs.3.rs-7669871/v1), 2025-10-08
Supplement: Supplementary file 2 [file f7b706fc7a7c29456ae76363.docx]

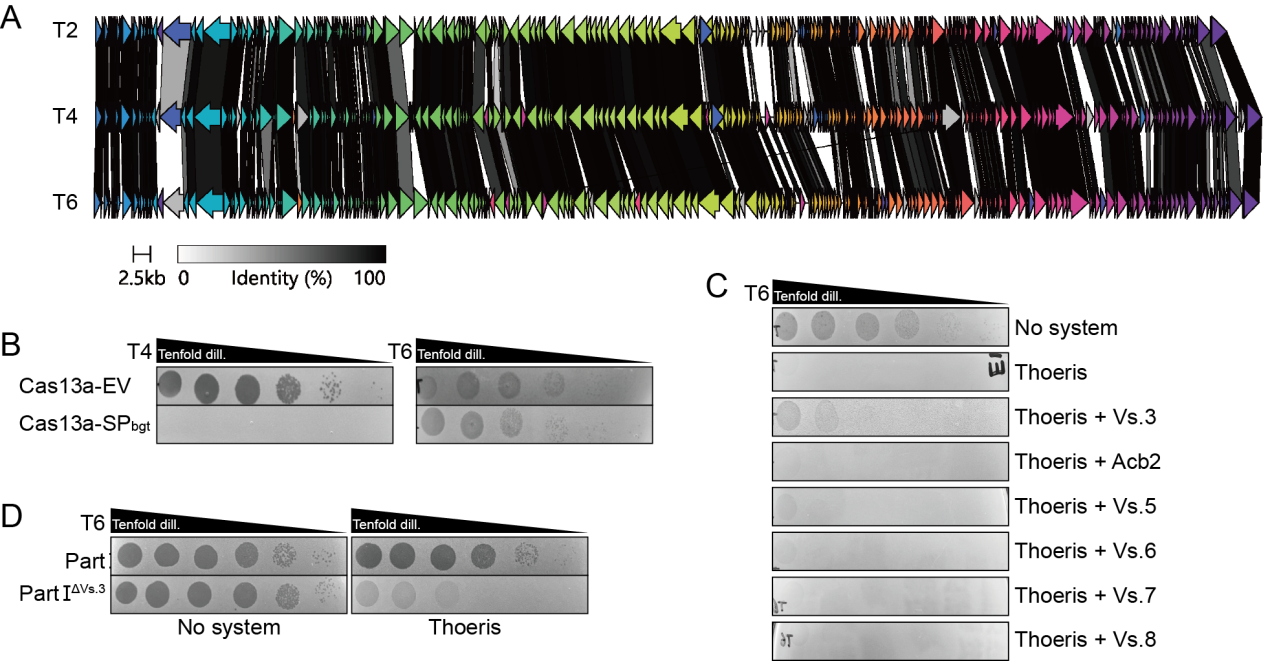


**Fig. S1. Phage hybridization identified T4 TadIV-1.**

(A) Genome comparison of T2, T4 and T6.

(B) Efﬁciency of plating of T2, T4 and T6 infecting *E. coli* containing an artifitial CRISPR-Cas13 system. SPbgt, a spacer targeting the T4 beta-glucosyltransferase gene; EV, no spacer.

(C) Efﬁciency of plating of T6 infecting *E. coli* expressing type IV Thoeris and each gene from the Part I region.

(D) Efﬁciency of plating of T6 infecting *E. coli* expressing type IV Thoeris and Part I, or type IV Thoeris and Part I with a deletion of *vs.3*.


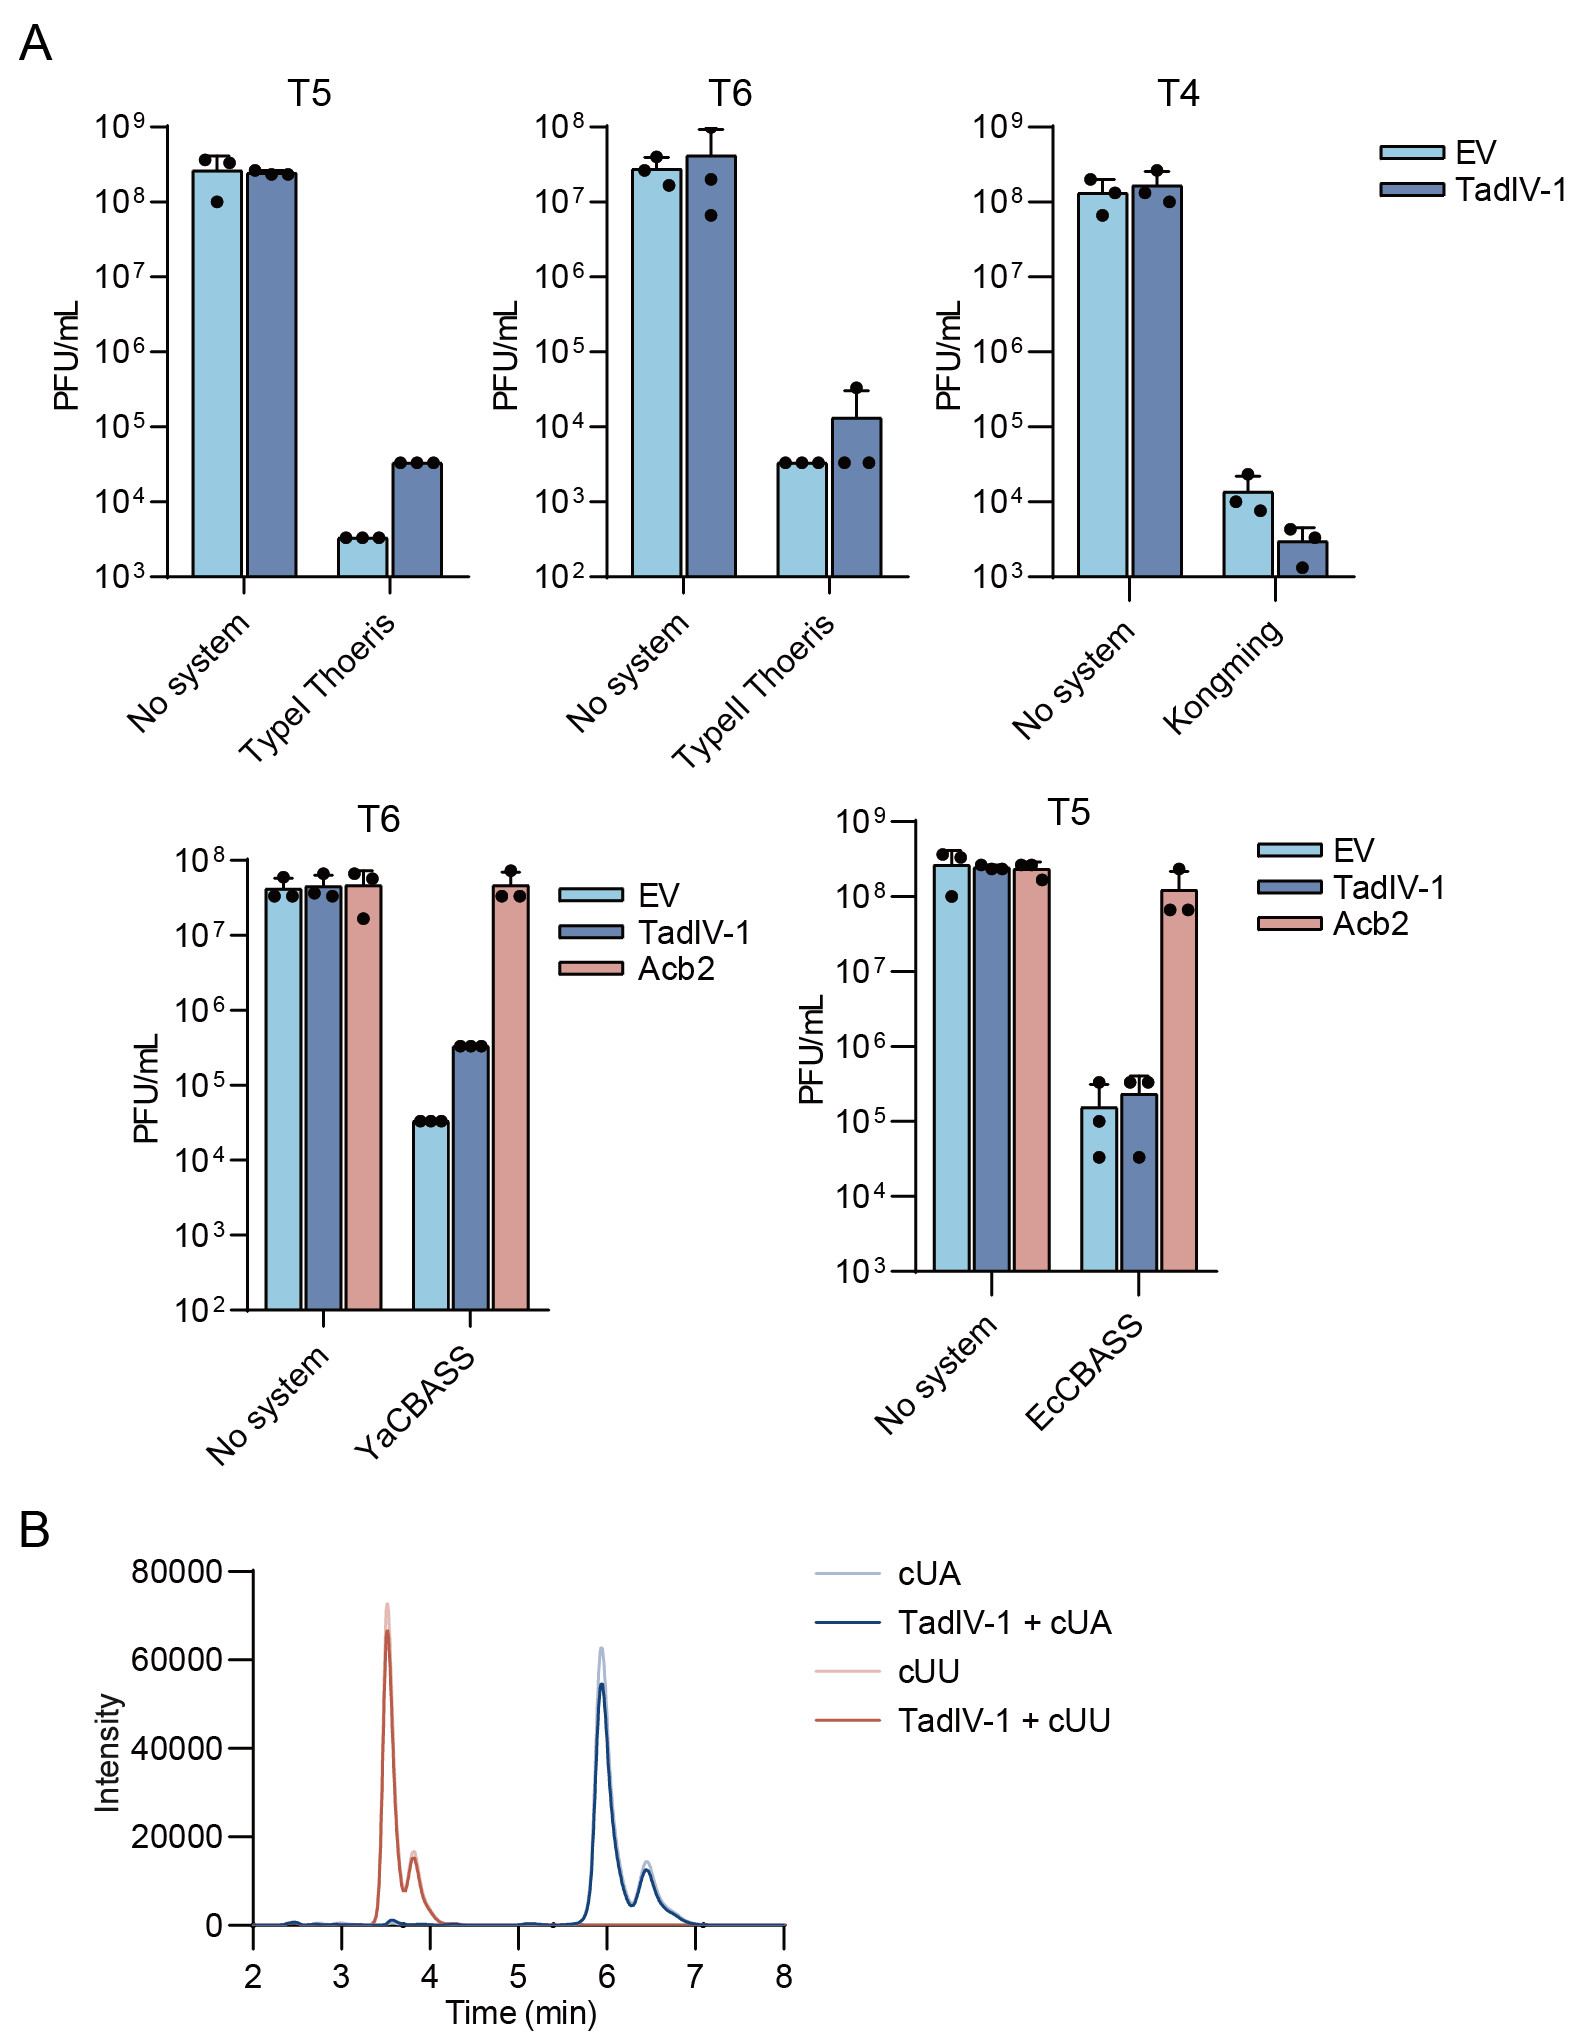


**Fig. S2. Effects of TadIV-1 on other immune signaling systems.**

(A) Plaque forming units of indicated phages were measured on plates expressing indicated defense systems with TadIV-1 or not. Data represent the mean ± SD of n = 3 biological replicates. The suppression of Acb2 on the CBASS systems were also analyzed as positive control.

(B) TadIV-1 does not bind to cUU or cUA *in vitro*. HPLC analysis of cUU and cUA post incubation with TadIV-1 or mock incubation.


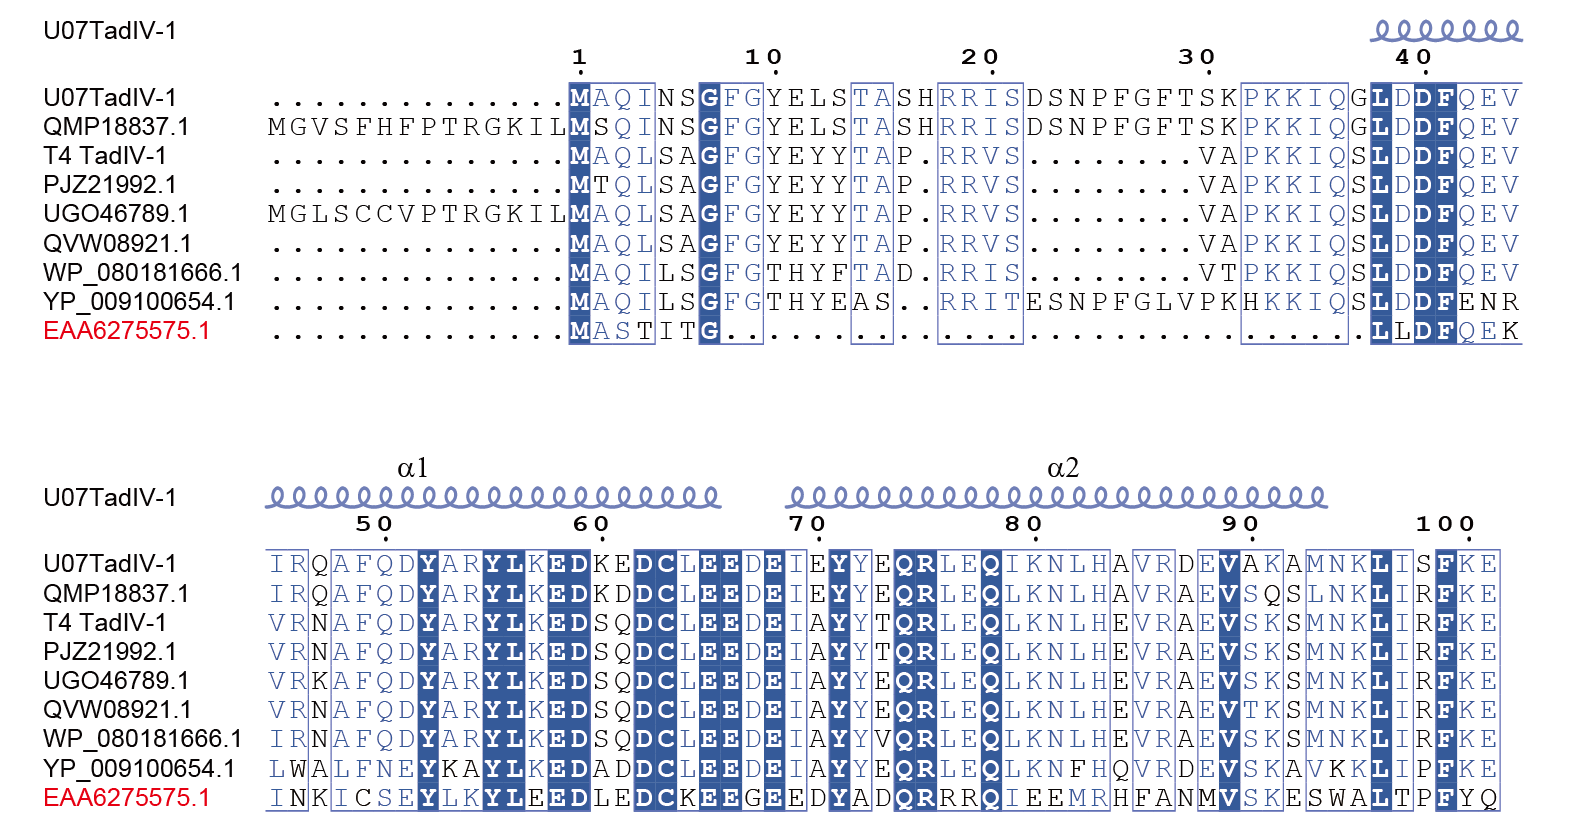


**Fig. S3. Sequence alignment of T4 TadIV-1 and 8 homologs that were analyzed experimentally.** The short TadIV-1 homolog is indicated in red. Secondary structure is shown above the alignment, based on the structure of U07TadIV-1.


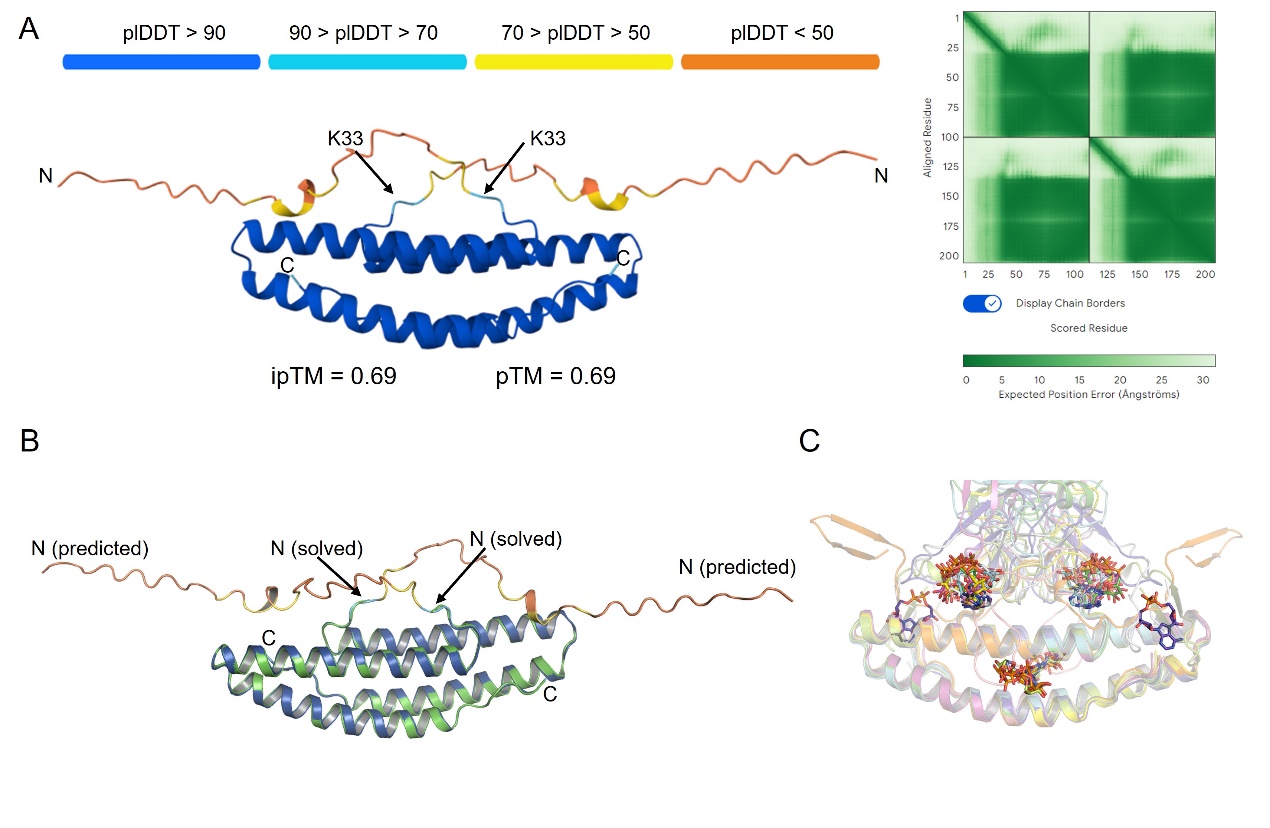


**Fig. S4. Predicted structures of apo and ligand-bound** **TadIV-1.**

(A) AlphaFold3-predicted structure of apo TadIV-1.

(B) Comparison of solved structure of apo TadIV-1 and that predicted by AlphaFold3. The solved structure of apo TadIV-1 is colored green. The predicted structure is colored as in A.

(C) Superimposition of the top 10 predicted structures of TadIV-1 bound with N7-cADPR. The ten TadIV-1- N7-cADPR structures are colored separately, in which N7-cADPR is shown as sticks in each structure.

**
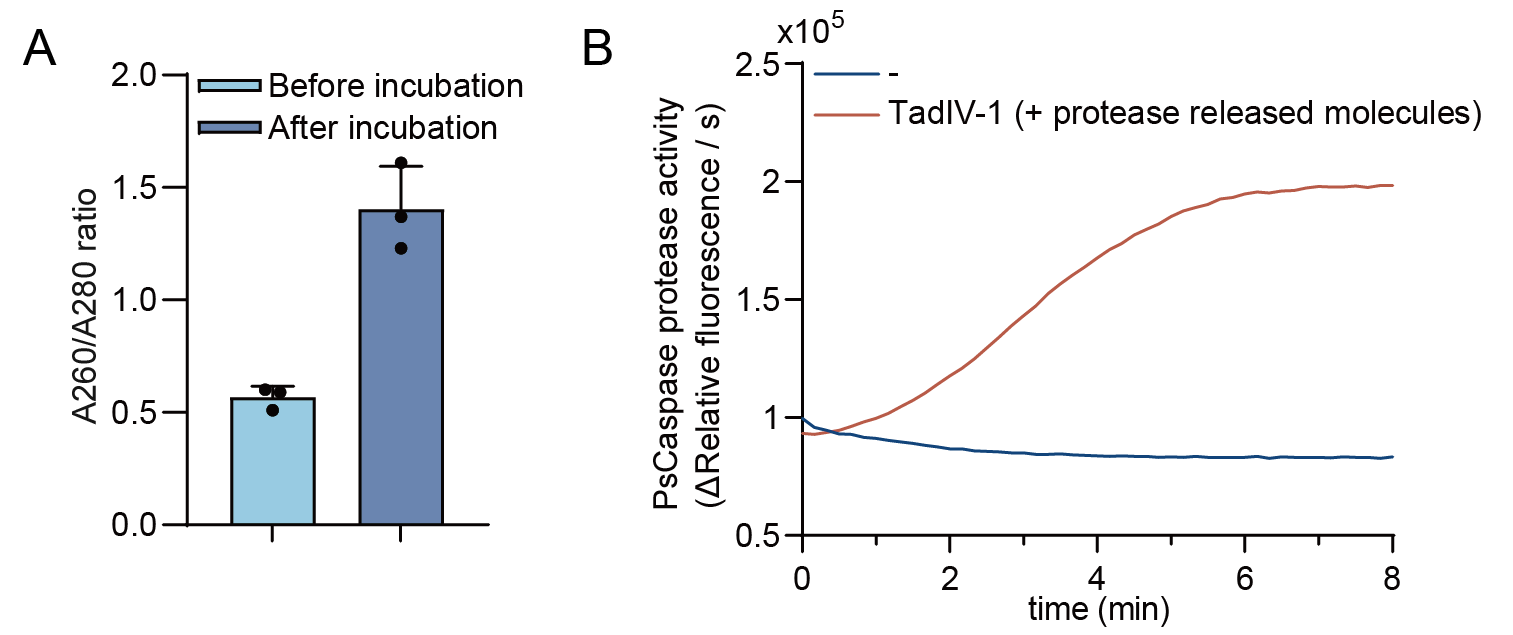
**

**Fig. S5. U07TadIV-1 was bound by N7-cADPR post incubation with lysate of TIR-expressing cells and gel filtration purification.**

(A) The ratio of absorbance at 260 nm and 280 nm of the purified U07TadIV-1 samples after or before incubation the lysate of T6-infected TIR-expressing cells. Mean ± SD is shown.

(B) Protease reporter assay showing the activity of *Ps*Caspase in response to the molecules released by proteolysis of U07TadIV-1.


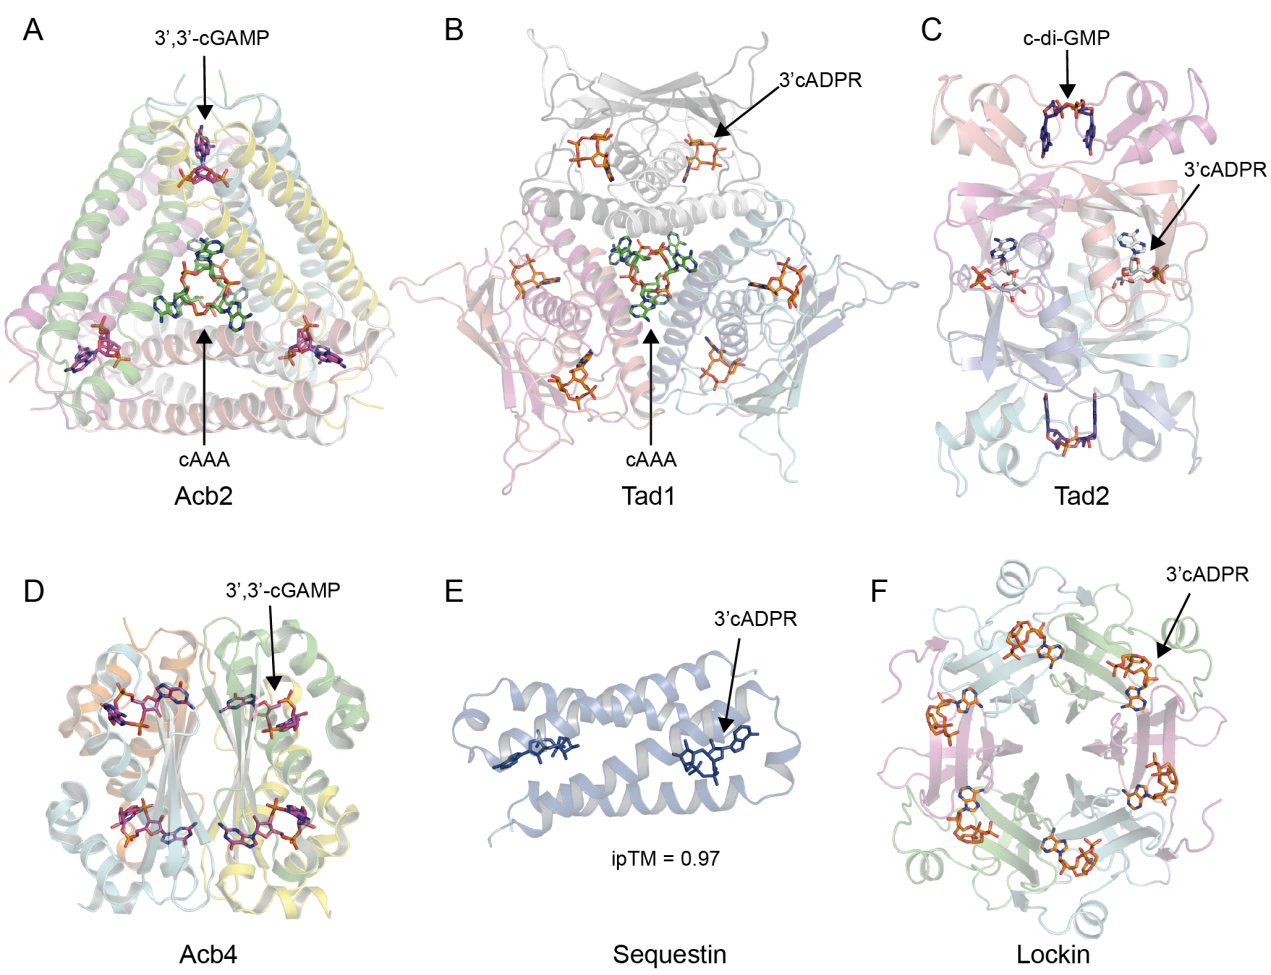


**Fig. S6. Structures of** **known phage sponge families**

(A-F) Structures of the six known phage sponge families with bound nucleotide shown as sticks. For (E), predicted model by Protenix is shown.

**Supplementary Table S1 Crystallographic statistics of U07TadIV-1**

| Statistics | U07TadIV-1 |
| --- | --- |
| **Data collection** |  |
| Space group | P 43 21 2 |
| Cell dimensions |  |
| *a*, *b*, *c* (Å) | 64.471 64.471 54.539 |
| (°) | 90 90 90 |
| Resolution (Å) | 41.64 - 2.56 (2.94 - 2.56)a,b |
| *R*sym or *R*merge (%) | 16.5 (96.2) |
| *I/σ*(*I*) | 29.1 (4.0) |
| Completeness (%) | 100 (100) |
| Redundancy | 44.1 (30.1) |
| **Refinement** |  |
| Resolution (Å) | 41.64 - 2.56 (2.94 - 2.56) |
| Unique reflection | 3979 (1288) |
| *R*work / *R*freec | 0.230 /0.269 |
| No. atoms | 607 |
| Protein | 591 |
| Ligand/ion | 5 |
| Water | 11 |
| *B* factors | 56.13 |
| Protein | 55.79 |
| Ligand/ion | 86.73 |
| Water | 60.63 |
| R.m.s. deviations |  |
| Bond lengths (Å) | 0.002 |
| Bond angles (°) | 0.30 |
| Ramachandran plot (%) |  |
| Favored | 100 |
| Allowed | 0 |
| Outliers | 0 |

a For each structure one crystal was used.

b Values in parentheses are for highest-resolution shell.

c Rfree was calculated with 5% of the reflections selected

**Supplementary Table S2** **Proteins analyzed in the study.**

**Supplementary Table S3** **Plasmids used in the study.**

**Supplementary Table S4 Primers used in the study**
